# Supplementary material for: School food environment: Quality and advertisement frequency of child-oriented packaged products within walking distance of public schools
Source: PubMed Central journal article supplement — Prev Med Rep. 2017 Apr 8;6:307–13. doi: 10.1016/j.pmedr.2017.03.021 (PMC5393165; doi:10.1016/j.pmedr.2017.03.021), 2017-04-08
Supplement: mmc8.pdf [file mmc8.pdf]

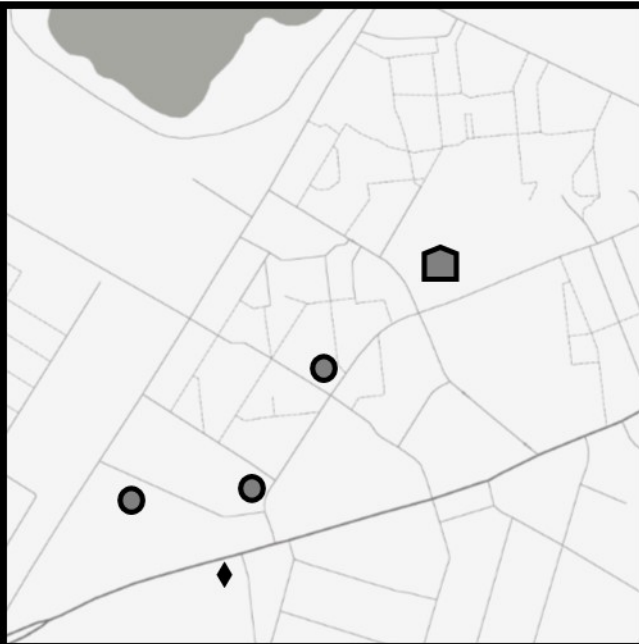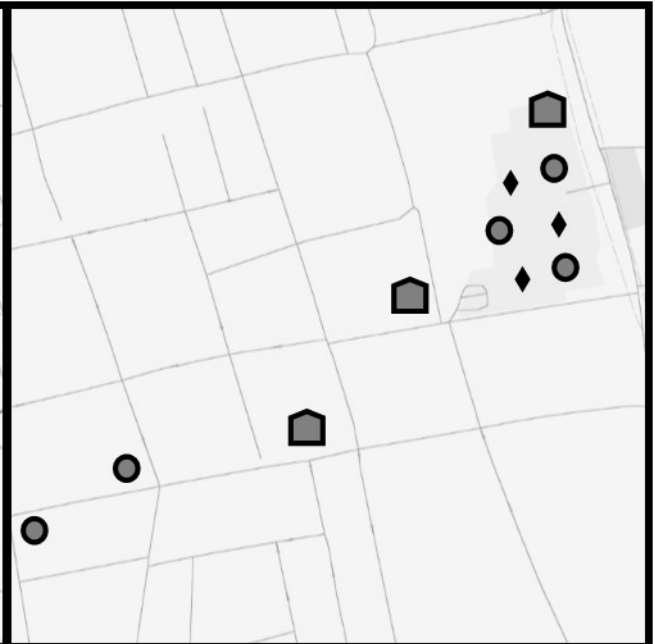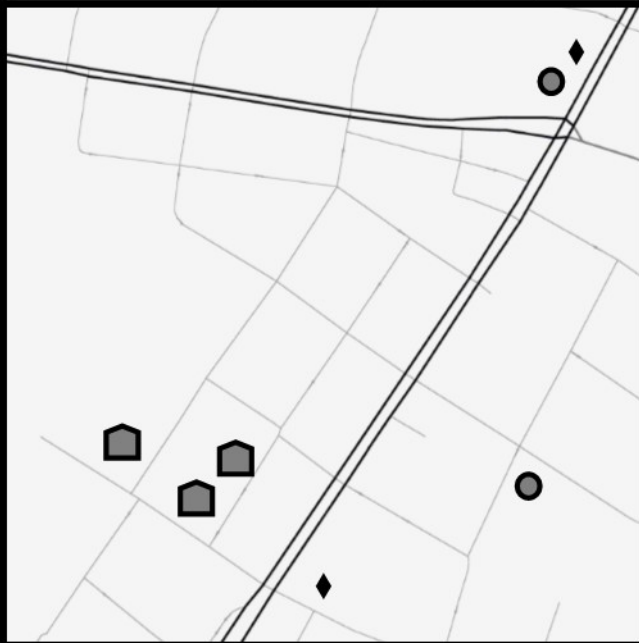

**Legend**

-  Location of School
-  Fast Food Outlet
-  Supermarket
-  Park
-  Road

100m

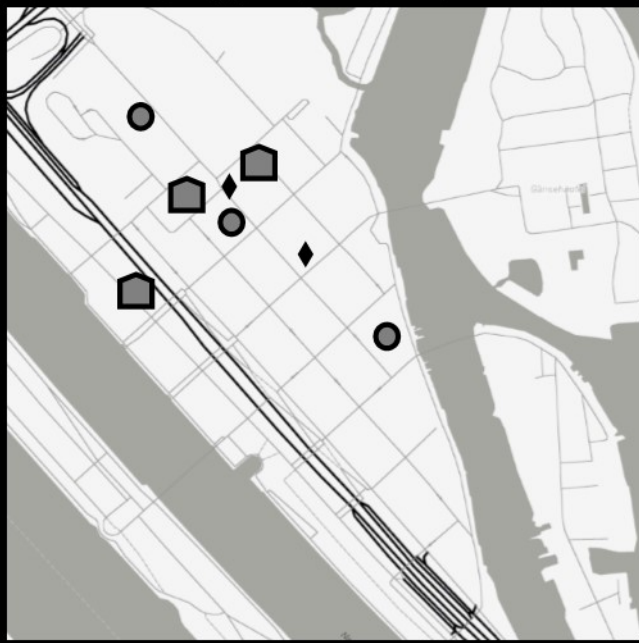

**Legend**

-  Location of School
-  Fast Food Outlet
-  Supermarket
-  Park
-  Road

200m
