# Supplementary figures and images for: School food environment: Quality and advertisement frequency of child-oriented packaged products within walking distance of public schools
Source: PubMed Central journal article supplement — Prev Med Rep. 2017 Apr 8;6:307–13. doi: 10.1016/j.pmedr.2017.03.021 (PMC5393165; doi:10.1016/j.pmedr.2017.03.021), 2017-04-08

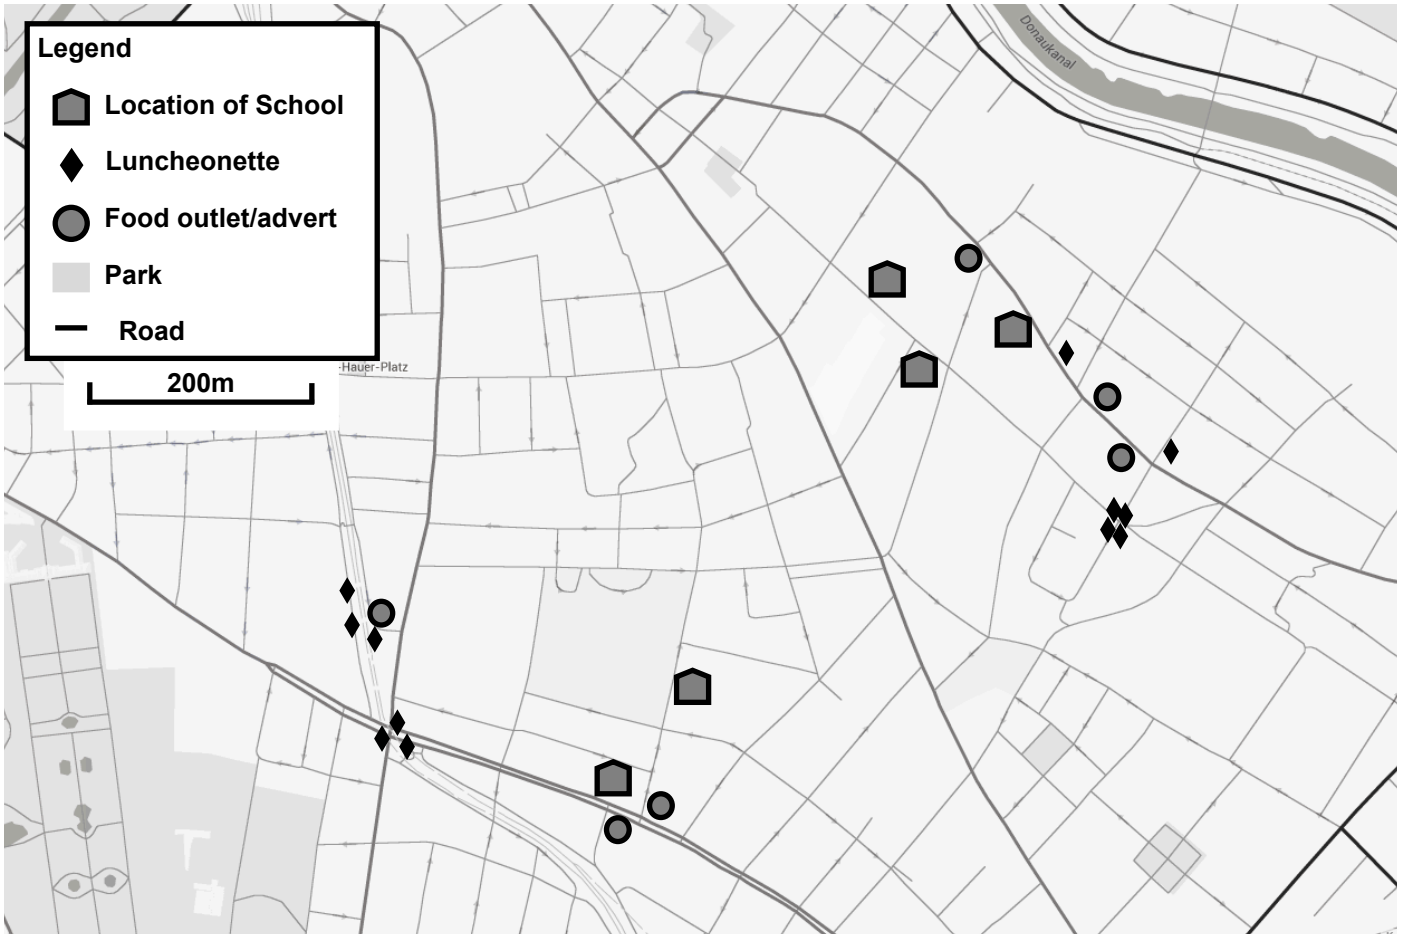

Supplement: mmc2.pdf [file mmc2.pdf]

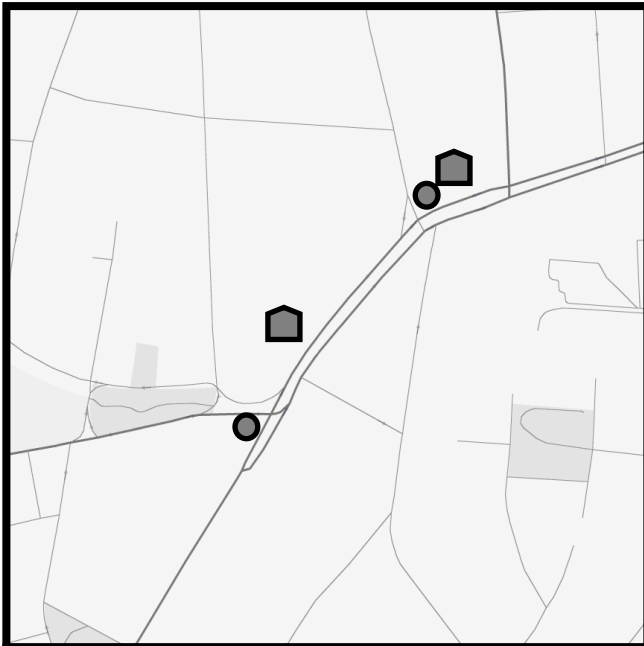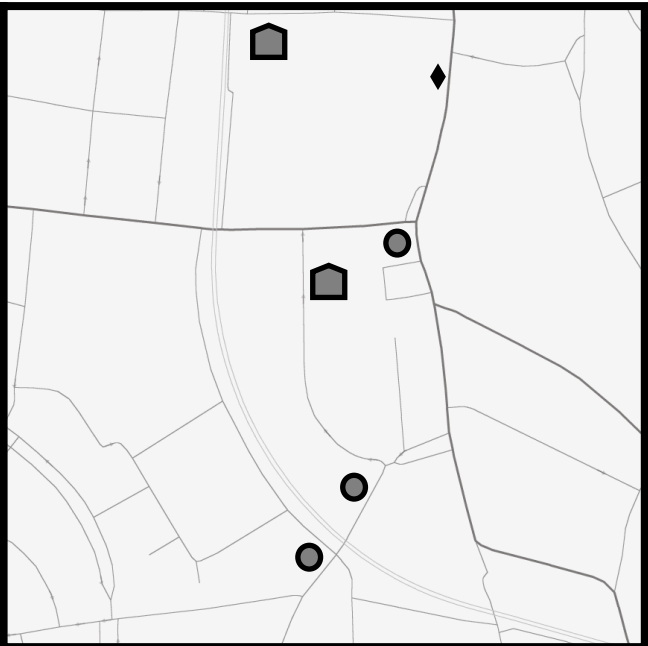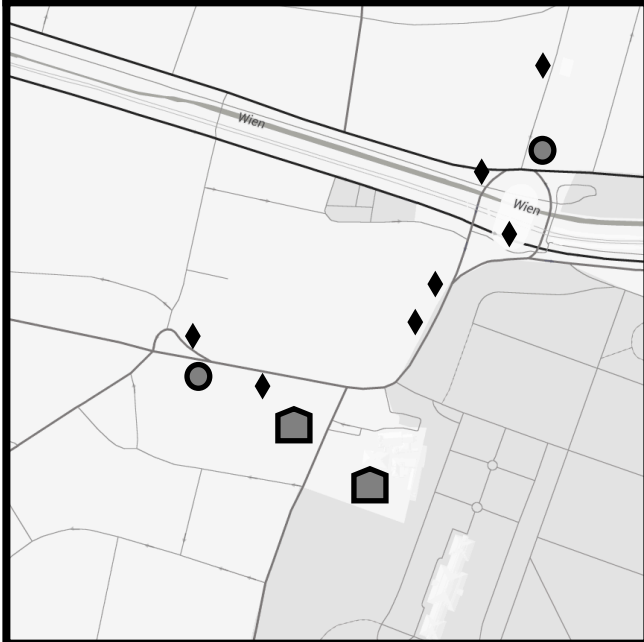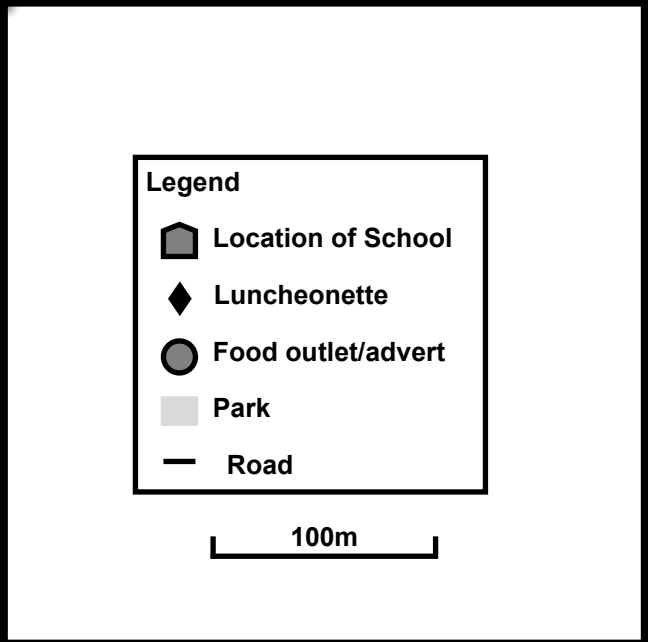

Supplement: mmc5.pdf [file mmc5.pdf]

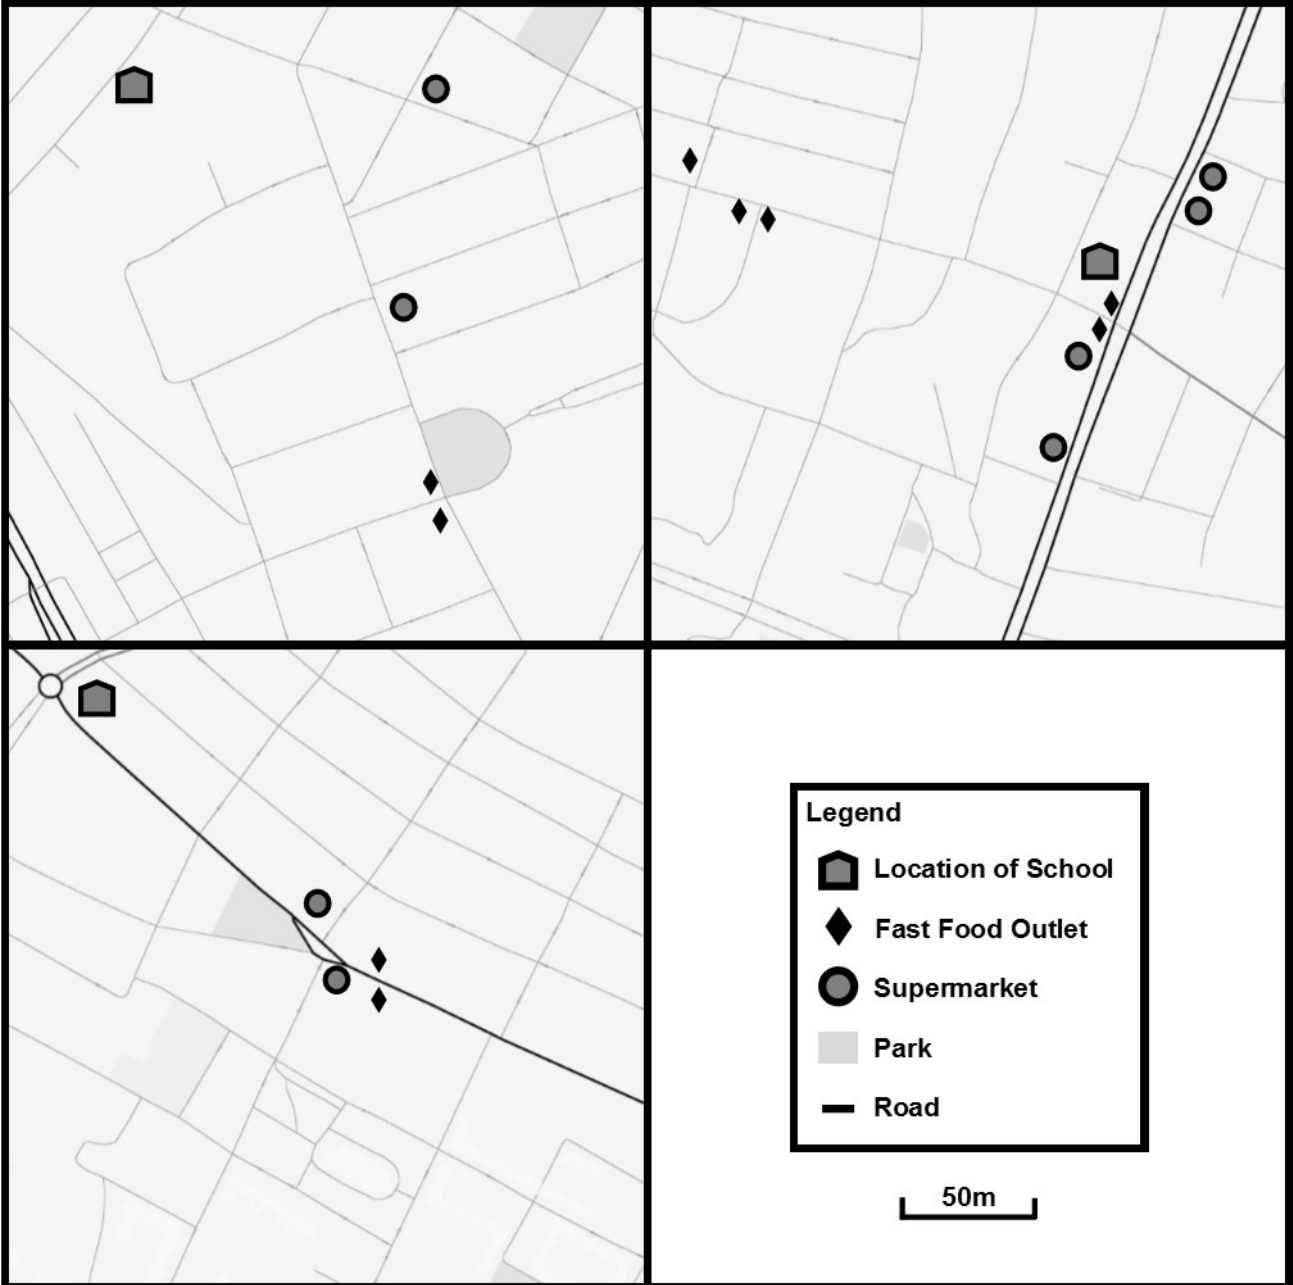

Supplement: mmc7.pdf [file mmc7.pdf]
